# Supplementary material for: A simple SERS sensor based on antibody-modified Fe3O4@Au MNPs for the detection of CA19-9 in CRC patients
Source: Royal Society of Chemistry journal article supplement (doi:10.1039/d4ay01382d), 2024-11-01
Supplement: d4ay01382d1.pdf [file d4ay01382d1.pdf]

**A simple prepared SERS sensor based on antibody-modified  
 $\text{Fe}_3\text{O}_4@Au$  MNPs for the detection of CA19-9 in CRC patients**

Miaowen Xu<sup>1#</sup>, Gaoyang Chen<sup>2#</sup>, Yong Huang<sup>3</sup>, Hangyu Song<sup>3</sup>, Zheng Wu<sup>3</sup>, Fengjuan Jiang<sup>4</sup>, Lei Fu<sup>3</sup>, Caili Bi<sup>1</sup>, Xiaowei Cao<sup>1\*</sup>, Wei Wei<sup>3\*</sup>

<sup>1</sup>Institute of Translational Medicine, Medical College, Yangzhou University, Yangzhou, Yangzhou, PR China

<sup>2</sup>Department of Oncology, The Second People's Hospital of Taizhou City, Taizhou, PR China

<sup>3</sup>Department of Gastrointestinal Surgery, Jiangdu People's Hospital affiliated to Yangzhou University, Yangzhou, PR China

<sup>4</sup>Department of Gastroenterology, Jiangdu People's Hospital Affiliated to Yangzhou University, Yangzhou, PR China

<sup>#</sup>These two authors contributed to this manuscript equally.

\*Corresponding author email: [cxw19861121@163.com](mailto:cxw19861121@163.com) and [jd.k.kenny@163.com](mailto:jd.k.kenny@163.com)

## 1. Interference evaluation

The SERS spectra was detected after mixing the CA19-9 solution (10 U/mL) separately with the CEA and CA125 solutions (both at 1000 U/mL). Fig. S1 showed that the ratio of the characteristic peak  $I_{1392}/I_{1069}$  remained unchanged. It indicated that CA19-9 detection by the SERS sensor without interference from other substances in serum.

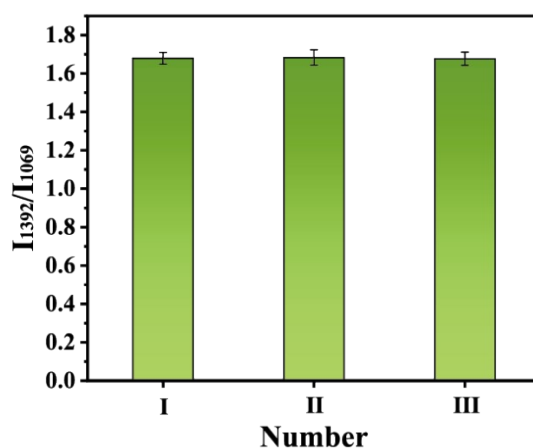

**Fig. S1** SERS spectra of CA19-9 solution (10 U/mL) mixed with CEA and CA125 solution (both at 1000 U/mL) respectively. (I) 10 U/mL CA19-9 solution; (II) 10 U/mL CA19-9 solution + 1000 U/mL CEA solution; (III) 10 U/mL CA19-9 solution + 1000 U/mL CA125 solution

## 2. SERS detection

Different concentrations of CA19-9 antigen (0.01, 0.1, 1, 10, 100 and 1000 U/mL) were detected by SERS sensor. Fig. S2 showed the local amplification of the SERS spectra obtained, which could see the change of characteristic peak more clearly.

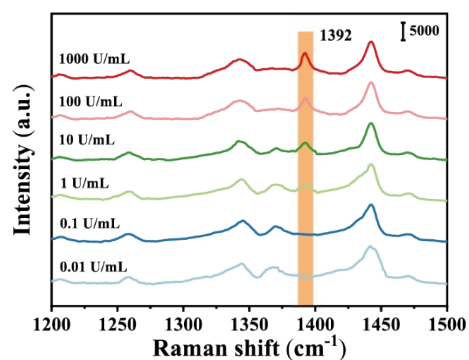

**Fig. S2** SERS spectra obtained from the reaction of SERS sensor with CA19-9 antigen of different concentrations (0.01, 0.1, 1, 10, 100 and 1000 U/mL)

### 3. Clinical sample Analysis

The CA19-9 concentrations in serum samples from 30 healthy individuals and 30 CRC patients were shown in Table S1 and Table S2.

**Table S1** Results of the SERS sensor for health individuals

| Sample | CA19-9 (U/mL) |
|--------|---------------|
| 1      | 10.702        |
| 2      | 8.667         |
| 3      | 11.988        |
| 4      | 6.462         |
| 5      | 7.803         |
| 6      | 13.848        |
| 7      | 14.782        |
| 8      | 11.422        |
| 9      | 5.613         |
| 10     | 6.891         |
| 11     | 18.373        |
| 12     | 26.605        |
| 13     | 9.569         |
| 14     | 8.202         |
| 15     | 12.371        |
| 16     | 9.089         |
| 17     | 7.003         |
| 18     | 13.988        |
| 19     | 16.726        |
| 20     | 14.067        |
| 21     | 13.270        |
| 22     | 12.495        |
| 23     | 7.629         |
| 24     | 22.387        |
| 25     | 19.118        |
| 26     | 16.930        |
| 27     | 9.479         |
| 28     | 13.603        |
| 29     | 8.866         |
| 30     | 12.990        |

**Table S2** Results of the SERS sensor for CRC patients

| Sample | CA19-9 (U/mL) |
|--------|---------------|
| 1      | 48.318        |
| 2      | 67.497        |
| 3      | 61.907        |
| 4      | 52.749        |
| 5      | 70.225        |
| 6      | 39.750        |
| 7      | 49.411        |
| 8      | 54.264        |
| 9      | 42.752        |
| 10     | 56.778        |
| 11     | 68.014        |
| 12     | 38.401        |
| 13     | 47.433        |
| 14     | 72.362        |
| 15     | 42.445        |
| 16     | 62.371        |
| 17     | 92.032        |
| 18     | 51.319        |
| 19     | 71.831        |
| 20     | 59.086        |
| 21     | 41.990        |
| 22     | 43.257        |
| 23     | 45.062        |
| 24     | 64.405        |
| 25     | 52.531        |
| 26     | 59.820        |
| 27     | 40.004        |
| 28     | 79.521        |
| 29     | 83.297        |
| 30     | 57.564        |
